# Supplementary material
Source: PubMed Central journal article supplement (PMC5514683)
Supplement: AEM.00590-17_zam015177973s1.pdf [file AEM.00590-17_zam015177973s1.pdf]

1 **An environment friendly engineered *Azotobacter* can replace substantial amount**  
2 **of urea fertilizer and yet sustain same wheat yield**

3

4 **Supplementary Figures and Tables**

5

6 TAGACGAGGCACAGCATGACCCCGGCCAACCCGACCCTGAGCAACGAGCCGCAAGCGCCTCACGCCGAG

7 AGCGACGAGCTGCTTCCCGAGATCTTTCGCCAGACGGTGGAGCATGCGCCCATCGCCATTTCCATCACC

8 GACCTCAAGGCCAACATTCTTTACGCCAATCGCGCTTTCGCGACCATCACCGGCTACGGCAGCGAGGAA

9 GTGCTCGGCAAGAACGAATCGATCCTCTCCAACGGCACCACGCCGCGCCTGGTCTACCAGGCCCTGTGG

10 GGCTGGCTGGCGCAGAAGAAGCCCTGGTCCGGCGTGCTGGTCAACCGCCGCAAGGACAAGACCCTGTAC

11 CTGGCCGAAGTACCCTGGCGCCGGTGCTCAACGAGGCCGGCGAGACCATCTACTACCTGGGCATGCAC

12 CGCGACACCAGCGAATTGCACGAACTGGAACAACGCGTCAACAACCAGCGCCTGATGATCGAGGCGGTG

13 GTCAGCGCCGCCCCGGCGGCATGGTGGTGTCTGACCGCCAGCACCGGGTGATGCTCTCCAACCCGAGC

14 TTCTGCCGCCTGGCCCGCGACCTGGTTCGAGGATGGCAGCAGCGAGAGCCTGGTGGCGCTGCTGCGGGAA

15 AACCTCGCCGCCCCCTTCGAGACGCTGGAAAACCAGGGCAGCGCCTTCTCCGGCAAGGAGATCTCCTTC

16 GACCTGGGCGGCCGCTCGCCGCGCTGGCTGTCTGCCACGGCCGGGCCATCCACATCGAGAACGAGCAG

17 GCCCACGTGTTCTTCGCGCCCACCGAGGAACGCTACCTGCTGCTGACCATCAACGACATCTCCGAGCTG

18 CGCCAGAAGCAGCAGGATTCGCGGCTCAACGCGCTGAAGGCGCTGATGGCCGAGGAAGAGCTGCTGGAA

19 GGCATGCGCGAGACCTTCAACGCCGCCATCCATCGCCTGCAGGGCCCGGCCAACCTGATCAGCGCGGCG

20 ATGCGCATGCTCGAACGGCGCCTCGGCGGCAAGGCCGGCAACGACCCGGTGCTGAGCGCCATGCGCGAA

21 GCCAGCACGGCCGGAATGGAGGCACTGGAGAACCTCAGTGGCTCCATTCCGGTGCGCATGGCCGAGTCC

22 AAGATGCCGGTCAACCTCAACCAGTTGATCCGCGAGGTGATCACCCCTGTGCACCGACCAGTTGCTGGCC

23 CAGGGCATCGTCGTCGACTGGCAGCCGGCGCTGCGCCTGCCCTGGGTGATGGGCGGGGAAAGCAGCCTG

24 CGCAGCATGATCAAGCACCTGGTGCACAACGCCATCGAGTCCATGAGCCAGAACCAGGTGAGCCGCCG

25 GAGCTGTTTCATCAGCACCCGCGTGGAGAACCACCTGGTGCATGGAGATCACCGACAGCGGCCCGGGC

26 ATTCCGCCCCGACCTGGTGTGAAGGTGTTTCGAGCCGTTCTTCTGCACCAAGCCGCCACACCGCGTCGGG

27 CGCGGCACGGGCCTGCCGGTGGTGCAGGAGATCGTCGCCAAGCACGCCGGCATGGTGCACGTAGACACC

28 GACTATCGCGAAGGCTGCCGGATCGTCGTCGAGCTGCCCTTCTCGGCCTCCACCTC**TAG**AGTCGA

29

30

31 **Fig. S1. Base sequence of *A. chroococcum* CBD15 *nifL* gene.** The red triplets **ATG**

32 and **TAG** represent the initiator and the terminator codons.

33

34 AATTTCATGTTTGACAGCTTATCATCGATAAGCTTTAATGCGGTAGTTTATCACAGTTAAATTGCTGAC  
35 GCAGTCAGGCACCGTGTATGAAATCTAACAATGCGCTCATCGTCATCCTCGGCACCGTCACCCTGGATGC  
36 TGTAGGCATAGGCTTGGTTATGCCGGTACTGCCGGGCCTCTTGCGGGATATCGTCCATTCCGACAGCATC  
37 GCCAGTCACTATGGCGTGCTGCTAGCGCTATATGCGTTGATGCGATTTCTATGCGCACCCGTTCTCGGAG  
38 CACTGTCCGACCGCTTTGGCCGCTGCCAGTCCTGCTCGCTTCGCTACTTGGAGCCACTATCGACTACGC  
39 GATCATGGCGACCACACCCGTCCTGTGGATC

40  
41 **Fig. S2. Base sequence of the 381 bp *EcoRI-Bam*HI fragment from pBR322,**  
42 **carrying the *Tet* promoter.**

43

44 TAGACGAGGCACAGC**ATG**ACCCCGGCCAACCCGACCCTGAGCAACGAGCCGCAAGCGCCTCACGCCGAGA  
45 GCGACGAGCTGCTTCCCGAGATCTTTCGCCAGACGGTGGAGCATGCGCCCATCGCCATTTCCATCACCGA  
46 CCTCAAGGCCAACATTCTTTACGCCAATCGCGCTTTCGCGACCATCACCCGGCTACGGCAGCGAGGAAGTG  
47 CTCGGCAAGAACGAATCGATCCTCTCCAACGGCACCCGCGCCTGGTCTACCAGGCCCTGTGGGGCT  
48 GGCTGGCGCAGAAGAAGCCCTGGTCC**AATTCTCATGTTTGACAGCTTATCATCGATAAGCTTTAATGCGG**  
49 **TAGTTTATCACAGTTAAATTGCTGACGCAGTCAGGCACCGTGTATGAAATCTAACAATGCGCTCATGTCA**  
50 **TCCTCGGCACCGTCACCCTGGATGCTGTAGGCATAGGCTTGGTTATGCCGGTACTGCCGGGCCTCTTGCG**  
51 **GGATATCGTCCATTCCGACAGCATCGCCAGTCACTATGGCGTGCTGCTAGCGCTATATGCGTTGATGCGA**  
52 **TTTCTATGCGCACCCGTTCTCGGAGCACTGTCCGACCGCTTTGGCCGCTGCCAGTCCTGCTCGCTTCGC**  
53 **TACTTGGAGCCACTATCGACTACGCGATCATGGCGACCACACCCGTCCTGTGGA**TCTTCTGCACCAAGCC  
54 GCCACACCGCGTCGGGCGCGGCACGGCCCTGCCGGTGGTGCAGGAGATCGTCGCCAAGCACGCCGGCATG  
55 GTGCACGTAGACACCGACTATCGCGAAGGCTGCCGGATCGTCGTCGAGCTGCCCTTCTCGGCCTCCACCT  
56 **CTAG**AGTCGA

57  
58

59 **Fig. S3. Sequence of bases of the *nifL* region of *Azotobacter chroococcum***  
60 **HKD15.** The sequence shown in normal straight letters represents the bases of the *nifL*  
61 gene, while the sequence shown in bold represents the bases of the DNA fragment  
62 from pBR322 containing the *Tet* promoter. The red triplets **ATG** and **TAG** represent the  
63 initiator and the terminator codons.

64

65 **Table S1.** Production of indole acetic acid (IAA) by *Azotobacter chroococcum* CBD15  
66 and by *Azotobacter chroococcum* HKD15

67

|                                      | IAA production * (ppm/mg protein) |                                          |
|--------------------------------------|-----------------------------------|------------------------------------------|
|                                      | In the absence of tryptophan      | In the presence of tryptophan (50 µg/ml) |
| <i>Azotobacter chroococcum</i> CBD15 | 4.7 (0.9)                         | 9.4 (0.5)                                |
| <i>Azotobacter chroococcum</i> HKD15 | 4.3 (0.4)                         | 10.9 (0.9)                               |

68

69 \*Average of 3 experiments; standard deviation in parenthesis.

70

71 **Table S2 A.** Population of *Bacteria* in general in the rhizosphere soil of wheat plants.

72 Nutrient agar was used as the selective medium.

73

| Soil sampling date in relation to seed sowing date | Inoculation of wheat seeds ( <i>A. chroococcum</i> ) | Urea applied to soil (kg N / hectare) | Bacteria / gm of rhizosphere soil* ( $\times 10^7$ ) |
|----------------------------------------------------|------------------------------------------------------|---------------------------------------|------------------------------------------------------|
| 14 Days before                                     | None                                                 | None                                  | 1.2 (0.2)                                            |
| 33 Days after                                      | None                                                 | None                                  | 3.8 (0.5)                                            |
| 33 Days after                                      | CBD15                                                | None                                  | 4.9 (1.1)                                            |
| 33 Days after                                      | HKD15                                                | None                                  | 5.2 (1.0)                                            |
| 33 Days after                                      | None                                                 | 120                                   | 3.7 (2.0)                                            |
| 90 Days after                                      | None                                                 | None                                  | 1.6 (0.4)                                            |
| 90 Days after                                      | CBD15                                                | None                                  | 1.8 (0.1)                                            |
| 90 Days after                                      | HKD15                                                | None                                  | 2.0 (0.3)                                            |
| 90 Days after                                      | None                                                 | 120                                   | 1.7 (0.1)                                            |
| 125 Days after                                     | None                                                 | None                                  | 4.4 (0.1)                                            |
| 125 Days after                                     | CBD15                                                | None                                  | 5.2 (0.2)                                            |
| 125 Days after                                     | HKD15                                                | None                                  | 5.2 (0.3)                                            |
| 125 Days after                                     | None                                                 | 120                                   | 3.9 (1.6)                                            |
| 140 Days after**                                   | None                                                 | None                                  | 2.8 (1.1)                                            |
| 140 Days after                                     | CBD15                                                | None                                  | 2.9 (1.2)                                            |
| 140 Days after                                     | HKD15                                                | None                                  | 3.4 (1.4)                                            |
| 140 Days after                                     | None                                                 | 120                                   | 3.1 (2.1)                                            |

74

75 \* Standard deviation in parenthesis.

76 \*\* Harvesting was done between 129 to 136 days after sowing.

77

78 **Table S2 B.** Population of *Fungi* in general in the rhizosphere soil of wheat plants.

79 Martin's Rose Bengal agar was used as the selective medium.

80

| Soil sampling date in relation to seed sowing date | Inoculation of wheat seeds ( <i>A. chroococcum</i> ) | Urea applied to soil (kg N / hectare) | <i>Fungi</i> / gm of rhizosphere soil* (x 10 <sup>3</sup> ) |
|----------------------------------------------------|------------------------------------------------------|---------------------------------------|-------------------------------------------------------------|
| 14 Days before                                     | None                                                 | None                                  | 1.2 (0.2)                                                   |
| 33 Days after                                      | None                                                 | None                                  | 1.8 (0.3)                                                   |
| 33 Days after                                      | CBD15                                                | None                                  | 2.1 (0.4)                                                   |
| 33 Days after                                      | HKD15                                                | None                                  | 1.7 (0.3)                                                   |
| 33 Days after                                      | None                                                 | 120                                   | 1.6 (0.2)                                                   |
| 90 Days after                                      | None                                                 | None                                  | 0.5 (0.2)                                                   |
| 90 Days after                                      | CBD15                                                | None                                  | 1.6 (0.7)                                                   |
| 90 Days after                                      | HKD15                                                | None                                  | 1.0 (0.1)                                                   |
| 90 Days after                                      | None                                                 | 120                                   | 0.6 (0.2)                                                   |
| 125 Days after                                     | None                                                 | None                                  | 4.0 (0.4)                                                   |
| 125 Days after                                     | CBD15                                                | None                                  | 3.8 (0.3)                                                   |
| 125 Days after                                     | HKD15                                                | None                                  | 4.0 (0.7)                                                   |
| 125 Days after                                     | None                                                 | 120                                   | 3.6 (0.2)                                                   |
| 140 Days after**                                   | None                                                 | None                                  | 2.0 (1.3)                                                   |
| 140 Days after                                     | CBD15                                                | None                                  | 2.5 (1.2)                                                   |
| 140 Days after                                     | HKD15                                                | None                                  | 2.2 (0.6)                                                   |
| 140 Days after                                     | None                                                 | 120                                   | 1.9 (1.5)                                                   |

81

82 \* Standard deviation in parenthesis.

83 \*\* Harvesting was done between 129 to 136 days after sowing.

84

85 **Table S2 C.** Population of *Actinomycetes* in general in the rhizosphere soil of wheat  
 86 plants. Ken Knight's agar was used as the selective medium.

87

| Soil sampling date in relation to seed sowing date | Inoculation of wheat seeds ( <i>A. chroococcum</i> ) | Urea applied to soil (kg N / hectare) | <i>Actinomycetes</i> / gm of rhizosphere soil* (x 10 <sup>4</sup> ) |
|----------------------------------------------------|------------------------------------------------------|---------------------------------------|---------------------------------------------------------------------|
| 14 Days before                                     | None                                                 | None                                  | 3.3 (0.6)                                                           |
| 33 Days after                                      | None                                                 | None                                  | 4.0 (0.9)                                                           |
| 33 Days after                                      | CBD15                                                | None                                  | 4.0 (0.7)                                                           |
| 33 Days after                                      | HKD15                                                | None                                  | 5.3 (2.1)                                                           |
| 33 Days after                                      | None                                                 | 120                                   | 5.0 (1.0)                                                           |
| 90 Days after                                      | None                                                 | None                                  | 2.9 (0.6)                                                           |
| 90 Days after                                      | CBD15                                                | None                                  | 2.7 (0.3)                                                           |
| 90 Days after                                      | HKD15                                                | None                                  | 3.1 (0.9)                                                           |
| 90 Days after                                      | None                                                 | 120                                   | 5.1 (1.7)                                                           |
| 125 Days after                                     | None                                                 | None                                  | 9.6 (2.7)                                                           |
| 125 Days after                                     | CBD15                                                | None                                  | 9.0 (0.6)                                                           |
| 125 Days after                                     | HKD15                                                | None                                  | 10.6 (3.4)                                                          |
| 125 Days after                                     | None                                                 | 120                                   | 8.6 (1.6)                                                           |
| 140 Days after**                                   | None                                                 | None                                  | 5.7 (1.8)                                                           |
| 140 Days after                                     | CBD15                                                | None                                  | 4.9 (1.7)                                                           |
| 140 Days after                                     | HKD15                                                | None                                  | 6.5 (1.9)                                                           |
| 140 Days after                                     | None                                                 | 120                                   | 7.6 (1.5)                                                           |

88

89 \* Standard deviation in parenthesis.

90 \*\* Harvesting was done between 129 to 136 days after sowing.
